# Supplementary material
Source: ML conference proceedings conference paper supplement (https://openreview.net/forum?id=MbtUctg3KW)
Supplement: supplementary_material [file attachment]

## REFERENCES

- 540  
541  
542 Davide Abati, Angelo Porrello, Simone Calderara, and Rita Cucchiara. Latent space autoregression  
543 for novelty detection. In *Proceedings of the IEEE/CVF Conference on Computer Vision and*  
544 *Pattern Recognition*, pp. 481–490, 2019.
- 545 Guillaume Alain and Yoshua Bengio. What regularized auto-encoders learn from the data-generating  
546 distribution. *The Journal of Machine Learning Research*, 15(1):3563–3593, 2014.
- 547  
548 Haoyue Bai, Gregory Canal, Xuefeng Du, Jeongyeol Kwon, Robert D Nowak, and Yixuan Li. Feed  
549 two birds with one scone: Exploiting wild data for both out-of-distribution generalization and  
550 detection. In *International Conference on Machine Learning*, pp. 1454–1471. PMLR, 2023.
- 551 Liron Bergman, Niv Cohen, and Yedid Hoshen. Deep nearest neighbor anomaly detection. *arXiv*  
552 *preprint arXiv:2002.10445*, 2020.
- 553  
554 Ting Chen, Simon Kornblith, Mohammad Norouzi, and Geoffrey Hinton. A simple framework for  
555 contrastive learning of visual representations. In *International conference on machine learning*, pp.  
556 1597–1607. PMLR, 2020.
- 557 Xuhai Chen, Yue Han, and Jiangning Zhang. A zero-/few-shot anomaly classification and segmenta-  
558 tion method for cvpr 2023 vand workshop challenge tracks 1&2: 1st place on zero-shot ad and 4th  
559 place on few-shot ad. *arXiv preprint arXiv:2305.17382*, 2023.
- 560  
561 Yong Shean Chong and Yong Haur Tay. Abnormal event detection in videos using spatiotemporal  
562 autoencoder. In *International symposium on neural networks*, pp. 189–196. Springer, 2017.
- 563 Yang Cong, Junsong Yuan, and Ji Liu. Sparse reconstruction cost for abnormal event detection. In  
564 *CVPR 2011*, pp. 3449–3456. IEEE, 2011.
- 565  
566 Timothée Darcet, Maxime Oquab, Julien Mairal, and Piotr Bojanowski. Vision transformers need  
567 registers. In *The Twelfth International Conference on Learning Representations*, 2023.
- 568  
569 Sepideh Esmailpour, Bing Liu, Eric Robertson, and Lei Shu. Zero-shot out-of-distribution detection  
570 based on the pre-trained model clip. In *Proceedings of the AAAI conference on artificial intelligence*,  
571 volume 36, pp. 6568–6576, 2022.
- 572 William Falcon and Kyunghyun Cho. A framework for contrastive self-supervised learning and  
573 designing a new approach. *arXiv preprint arXiv:2009.00104*, 2020.
- 574  
575 Dong Gong, Lingqiao Liu, Vuong Le, Budhaditya Saha, Moussa Reda Mansour, Svetha Venkatesh,  
576 and Anton van den Hengel. Memorizing normality to detect anomaly: Memory-augmented deep  
577 autoencoder for unsupervised anomaly detection. In *Proceedings of the IEEE/CVF International*  
578 *Conference on Computer Vision*, pp. 1705–1714, 2019.
- 579 Kaiming He, Haoqi Fan, Yuxin Wu, Saining Xie, and Ross Girshick. Momentum contrast for  
580 unsupervised visual representation learning. In *Proceedings of the IEEE/CVF conference on*  
581 *computer vision and pattern recognition*, pp. 9729–9738, 2020.
- 582  
583 Dan Hendrycks, Mantas Mazeika, and Thomas Dietterich. Deep anomaly detection with outlier  
584 exposure. *arXiv preprint arXiv:1812.04606*, 2018.
- 585 Jongheon Jeong, Yang Zou, Taewan Kim, Dongqing Zhang, Avinash Ravichandran, and Onkar  
586 Dabeer. Winclip: Zero-/few-shot anomaly classification and segmentation. In *Proceedings of the*  
587 *IEEE/CVF Conference on Computer Vision and Pattern Recognition*, pp. 19606–19616, 2023.
- 588 John Taylor Jewell, Vahid Reza Khazaie, and Yalda Mohsenzadeh. One-class learned encoder-decoder  
589 network with adversarial context masking for novelty detection. In *Proceedings of the IEEE/CVF*  
590 *Winter Conference on Applications of Computer Vision*, pp. 3591–3601, 2022.
- 591  
592 Vahid Reza Khazaie, Anthony Wong, and Mohammad Sabokrou. Towards realistic out-of-distribution  
593 detection: A novel evaluation framework for improving generalization in ood detection. *arXiv*  
*preprint arXiv:2211.10892*, 2023.

- 594 Alex Krizhevsky, Geoffrey Hinton, et al. Learning multiple layers of features from tiny images.  
595 *Technical Report*, 2009.  
596
- 597 Aodong Li, Chen Qiu, Marius Kloft, Padhraic Smyth, Maja Rudolph, and Stephan Mandt. Zero-shot  
598 anomaly detection via batch normalization. *Advances in Neural Information Processing Systems*,  
599 36, 2024.
- 600 Philipp Liznerski, Lukas Ruff, Robert A Vandermeulen, Billy Joe Franks, Klaus-Robert Müller, and  
601 Marius Kloft. Exposing outlier exposure: What can be learned from few, one, and zero outlier  
602 images. *arXiv preprint arXiv:2205.11474*, 2022.  
603
- 604 Weixin Luo, Wen Liu, and Shenghua Gao. A revisit of sparse coding based anomaly detection in  
605 stacked rnn framework. In *Proceedings of the IEEE International Conference on Computer Vision*,  
606 pp. 341–349, 2017.
- 607 Hossein Mirzaei, Mohammadreza Salehi, Sajjad Shahabi, Efstratios Gavves, Cees GM Snoek,  
608 Mohammad Sabokrou, and Mohammad Hossein Rohban. Fake it till you make it: Near-distribution  
609 novelty detection by score-based generative models. *ICLR*, 2023.  
610
- 611 Yuval Netzer, Tao Wang, Adam Coates, Alessandro Bissacco, Bo Wu, and A Ng. The street view  
612 house numbers (svhn) dataset. *Technical Report*, 2018.  
613
- 614 Maxime Oquab, Timothée Darcet, Théo Moutakanni, Huy V Vo, Marc Szafraniec, Vasil Khalidov,  
615 Pierre Fernandez, Daniel HAZIZA, Francisco Massa, Alaaeldin El-Nouby, et al. Dinov2: Learning  
616 robust visual features without supervision. *Transactions on Machine Learning Research*, 2023.
- 617 Pramuditha Perera, Ramesh Nallapati, and Bing Xiang. Ocgan: One-class novelty detection using  
618 gans with constrained latent representations. In *Proceedings of the IEEE/CVF Conference on*  
619 *Computer Vision and Pattern Recognition*, pp. 2898–2906, 2019.
- 620 Masoud Pourreza, Bahram Mohammadi, Mostafa Khaki, Samir Bouindour, Hichem Snoussi, and  
621 Mohammad Sabokrou. G2d: Generate to detect anomaly. In *Proceedings of the IEEE/CVF Winter*  
622 *Conference on Applications of Computer Vision*, pp. 2003–2012, 2021.  
623
- 624 Alec Radford, Jong Wook Kim, Chris Hallacy, Aditya Ramesh, Gabriel Goh, Sandhini Agarwal,  
625 Girish Sastry, Amanda Askell, Pamela Mishkin, Jack Clark, et al. Learning transferable visual  
626 models from natural language supervision. In *International conference on machine learning*, pp.  
627 8748–8763. PMLR, 2021.
- 628 Tal Reiss and Yedid Hoshen. Mean-shifted contrastive loss for anomaly detection. In *Proceedings of*  
629 *the AAAI Conference on Artificial Intelligence*, volume 37, pp. 2155–2162, 2023.  
630
- 631 Tal Reiss, Niv Cohen, Liron Bergman, and Yedid Hoshen. Panda: Adapting pretrained features for  
632 anomaly detection and segmentation. In *Proceedings of the IEEE/CVF Conference on Computer*  
633 *Vision and Pattern Recognition*, pp. 2806–2814, 2021.
- 634 Mohammad Sabokrou, Mahmood Fathy, and Mojtaba Hoseini. Video anomaly detection and  
635 localisation based on the sparsity and reconstruction error of auto-encoder. *Electronics Letters*, 52  
636 (13):1122–1124, 2016.  
637
- 638 Mohammad Sabokrou, Mohammad Khalooei, Mahmood Fathy, and Ehsan Adeli. Adversarially  
639 learned one-class classifier for novelty detection. In *Proceedings of the IEEE Conference on*  
640 *Computer Vision and Pattern Recognition*, pp. 3379–3388, 2018.
- 641 Mayu Sakurada and Takehisa Yairi. Anomaly detection using autoencoders with nonlinear dimen-  
642 sionality reduction. In *Proceedings of the MLSDA 2014 2nd Workshop on Machine Learning for*  
643 *Sensory Data Analysis*, pp. 4–11, 2014.  
644
- 645 Thomas Schlegl, Philipp Seeböck, Sebastian M Waldstein, Ursula Schmidt-Erfurth, and Georg Langs.  
646 Unsupervised anomaly detection with generative adversarial networks to guide marker discovery.  
647 In *International conference on information processing in medical imaging*, pp. 146–157. Springer,  
2017.

- 648 Florian Schroff, Dmitry Kalenichenko, and James Philbin. Facenet: A unified embedding for face  
649 recognition and clustering. In *Proceedings of the IEEE conference on computer vision and pattern*  
650 *recognition*, pp. 815–823, 2015.
- 651 Kihyuk Sohn, Chun-Liang Li, Jinsung Yoon, Minh Jin, and Tomas Pfister. Learning and evaluat-  
652 ing representations for deep one-class classification. In *International Conference on Learning*  
653 *Representations*, 2020.
- 654 Jihoon Tack, Sangwoo Mo, Jongheon Jeong, and Jinwoo Shin. Csi: Novelty detec-  
655 tion via contrastive learning on distributionally shifted instances. In H. Larochelle,  
656 M. Ranzato, R. Hadsell, M.F. Balcan, and H. Lin (eds.), *Advances in Neural In-*  
657 *formation Processing Systems*, volume 33, pp. 11839–11852. Curran Associates, Inc.,  
658 2020a. URL [https://proceedings.neurips.cc/paper\\_files/paper/2020/](https://proceedings.neurips.cc/paper_files/paper/2020/file/8965f76632d7672e7d3cf29c87ecaa0c-Paper.pdf)  
659 [file/8965f76632d7672e7d3cf29c87ecaa0c-Paper.pdf](https://proceedings.neurips.cc/paper_files/paper/2020/file/8965f76632d7672e7d3cf29c87ecaa0c-Paper.pdf).
- 660 Jihoon Tack, Sangwoo Mo, Jongheon Jeong, and Jinwoo Shin. Csi: Novelty detection via contrastive  
661 learning on distributionally shifted instances. *Advances in neural information processing systems*,  
662 33:11839–11852, 2020b.
- 663 Guodong Wang, Yunhong Wang, Xiuguo Bao, and Di Huang. Rotation has two sides: Evaluating  
664 data augmentation for deep one-class classification. In *The Twelfth International Conference on*  
665 *Learning Representations*, 2023.
- 666 Dan Xu, Elisa Ricci, Yan Yan, Jingkuan Song, and Nicu Sebe. Learning deep representations of  
667 appearance and motion for anomalous event detection. *arXiv preprint arXiv:1510.01553*, 2015.
- 668 Sergey Zagoruyko and Nikos Komodakis. Wide residual networks. *European Conference on*  
669 *Computer Vision (ECCV)*, 2016.
- 670 M. Zaigham Zaheer, Arif Mahmood, M. Haris Khan, Mattia Segu, Fisher Yu, and Seung-Ik Lee.  
671 Generative cooperative learning for unsupervised video anomaly detection. In *Proceedings of the*  
672 *IEEE/CVF Conference on Computer Vision and Pattern Recognition (CVPR)*, pp. 14744–14754,  
673 June 2022.
- 674 Shuangfei Zhai, Yu Cheng, Weining Lu, and Zhongfei Zhang. Deep structured energy based models  
675 for anomaly detection. In *International Conference on Machine Learning*, pp. 1100–1109. PMLR,  
676 2016.
- 677 Chong Zhou and Randy C Paffenroth. Anomaly detection with robust deep autoencoders. In  
678 *Proceedings of the 23rd ACM SIGKDD international conference on knowledge discovery and data*  
679 *mining*, pp. 665–674, 2017.
- 680 Qihang Zhou, Guansong Pang, Yu Tian, Shibo He, and Jiming Chen. Anomalyclip: Object-agnostic  
681 prompt learning for zero-shot anomaly detection. *arXiv preprint arXiv:2310.18961*, 2023.
- 682 Arthur Zimek, Erich Schubert, and Hans-Peter Kriegel. A survey on unsupervised outlier detection  
683 in high-dimensional numerical data. *Statistical Analysis and Data Mining: The ASA Data Science*  
684 *Journal*, 5(5):363–387, 2012.
- 685 David Zimmerer, Simon AA Kohl, Jens Petersen, Fabian Isensee, and Klaus H Maier-Hein.  
686 Context-encoding variational autoencoder for unsupervised anomaly detection. *arXiv preprint*  
687 *arXiv:1812.05941*, 2018.
- 688 Bo Zong, Qi Song, Martin Renqiang Min, Wei Cheng, Cristian Lumezanu, Daeki Cho, and Haifeng  
689 Chen. Deep autoencoding gaussian mixture model for unsupervised anomaly detection. In  
690 *International Conference on Learning Representations*, 2018.
- 691  
692  
693  
694  
695  
696  
697  
698  
699  
700  
701

## APPENDIX

## A ADDITIONAL EXPERIMENTS AND RESULTS

Figure 5: Visualization of dynamically chosen negative and positive pairs for each class through Knowledge Exposure (KE) from randomly selected classes in CIFAR-100.

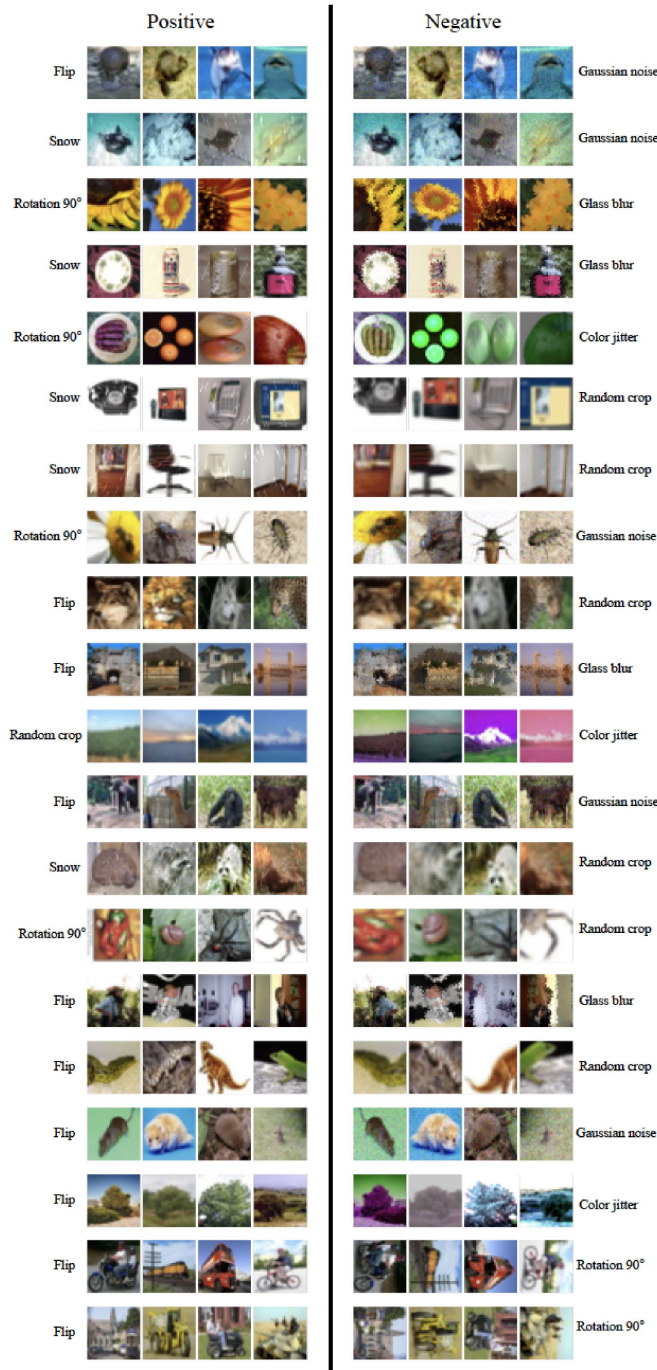

The effectiveness of Knowledge Exposure (KE) in dynamically selecting appropriate negative and positive pairs is evident. For instance, the identification of color jitter as a negative pair for fruits, sky scenes, or other color-dependent concepts is logical, as these transformations significantly disrupt the

color integrity crucial for anomaly detection. Similarly, for objects such as cars, buses, and bicycles, a 90-degree rotation is correctly identified as a negative pair since such rotations would render these objects anomalous in real-world scenarios. Conversely, for objects like apples or oranges, a 90-degree rotation is sensibly selected as a positive pair, as this transformation does not alter their conceptual integrity. Figure 5 clearly illustrates that KE performs effectively across various cases, reinforcing the results presented in the paper and highlighting the robustness and accuracy of our anomaly detection framework.

Table 5: AUROC (%) of various novelty detection methods trained on one-class setting of CIFAR-100 dataset.

| Classes  | CSI   |       | MSAD         |       | PANDA |       | DN2   |       | Ours  |              |
|----------|-------|-------|--------------|-------|-------|-------|-------|-------|-------|--------------|
|          | SD    | SPD   | SD           | SPD   | SD    | SPD   | SD    | SPD   | SD    | SPD          |
| Class 0  | 87.15 | 74.57 | 92.15        | 96.09 | 76.40 | 66.78 | 81.71 | 73.17 | 88.27 | 88.28        |
| Class 1  | 84.92 | 72.53 | 87.41        | 84.49 | 80.48 | 72.18 | 81.99 | 75.55 | 88.49 | 89.12        |
| Class 2  | 88.95 | 82.71 | 95.86        | 82.05 | 89.44 | 77.09 | 92.91 | 82.91 | 85.88 | 91.84        |
| Class 3  | 84.61 | 74.77 | 91.04        | 82.65 | 68.98 | 58.96 | 82.82 | 64.73 | 88.93 | 85.18        |
| Class 4  | 93.01 | 77.35 | 95.49        | 85.36 | 85.80 | 69.70 | 91.64 | 70.10 | 90.14 | 90.00        |
| Class 5  | 82.57 | 71.66 | 92.50        | 92.92 | 77.61 | 63.99 | 89.92 | 68.52 | 90.49 | 90.26        |
| Class 6  | 92.63 | 78.94 | 92.63        | 82.55 | 78.08 | 70.27 | 88.78 | 73.12 | 88.54 | 89.63        |
| Class 7  | 83.90 | 73.48 | 88.78        | 83.14 | 77.16 | 61.74 | 82.84 | 67.21 | 87.18 | 89.81        |
| Class 8  | 93.37 | 70.57 | 95.26        | 90.46 | 81.24 | 66.98 | 89.21 | 70.26 | 92.69 | 82.27        |
| Class 9  | 95.54 | 87.26 | 91.33        | 88.26 | 80.69 | 84.73 | 87.39 | 87.69 | 78.37 | 92.19        |
| Class 10 | 93.59 | 84.12 | 94.32        | 74.97 | 89.01 | 73.25 | 93.86 | 78.74 | 89.11 | 67.50        |
| Class 11 | 90.03 | 83.94 | 89.91        | 82.03 | 69.88 | 66.38 | 78.19 | 77.95 | 89.17 | 94.19        |
| Class 12 | 91.27 | 78.48 | 90.67        | 79.54 | 78.44 | 68.25 | 80.74 | 81.86 | 83.15 | 84.86        |
| Class 13 | 82.32 | 72.88 | 84.26        | 84.30 | 75.48 | 59.15 | 77.00 | 67.94 | 88.84 | 89.12        |
| Class 14 | 94.90 | 81.28 | 94.22        | 81.34 | 84.47 | 71.84 | 88.88 | 74.91 | 90.82 | 90.97        |
| Class 15 | 85.76 | 69.03 | 86.77        | 83.34 | 69.46 | 61.03 | 80.88 | 77.87 | 89.74 | 92.64        |
| Class 16 | 84.13 | 77.12 | 85.28        | 84.45 | 74.00 | 70.75 | 76.39 | 74.30 | 90.89 | 86.19        |
| Class 17 | 97.26 | 73.55 | 97.00        | 80.84 | 94.26 | 63.16 | 96.05 | 70.62 | 86.65 | 86.37        |
| Class 18 | 96.82 | 77.19 | 97.02        | 84.83 | 84.52 | 71.83 | 88.77 | 79.25 | 95.77 | 97.61        |
| Class 19 | 95.99 | 82.80 | 94.79        | 83.08 | 79.22 | 72.95 | 88.72 | 79.91 | 84.04 | 86.18        |
| Mean     | 89.93 | 77.21 | <b>91.83</b> | 84.33 | 79.73 | 68.55 | 85.93 | 74.83 | 88.35 | <b>88.21</b> |

## B RELATED WORKS

One of the most widely used techniques in anomaly detection involves employing self-supervised methods, which generate pseudo-labels from the data itself. Contrastive learning Falcon & Cho (2020), a self-supervised technique, has shown remarkable success in visual representation learning He et al. (2020); Chen et al. (2020). This method focuses on learning representations by contrasting positive and negative samples, ensuring that representations of similar (positive) instances are closer together, while representations of dissimilar (negative) instances are further apart. Common loss functions used include triplet loss, NT-Xent loss, and InfoNCE Schroff et al. (2015); Chen et al. (2020). Recent research has indicated that transformations once thought to be harmful in traditional contrastive learning can be beneficial in out-of-distribution (OOD) detection. In the Contrasting Shifted Instances (CSI) method Tack et al. (2020a), in addition to contrasting a given sample

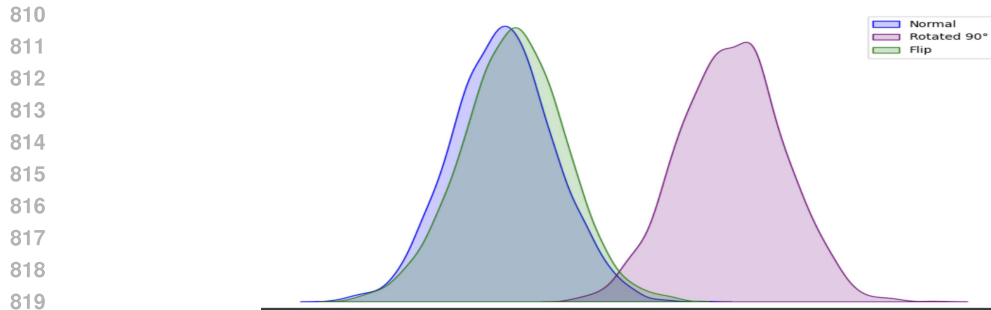

Figure 6: This figure illustrates the distribution of distances under different transformations: the blue distribution represents the original (normal) images, the green distribution represents flipped images, and the red distribution represents 90-degree rotated images of all instances from the "car" class in the CIFAR-10 dataset. The significant overlap between the rotated and normal data indicates that the model has a strong relation to rotation.

with other instances, the training scheme also contrasts the sample against distributionally shifted augmentations of itself, which enhances OOD detection Tack et al. (2020b). Transformations can result in either semantics-preserving or semantics-shifting images, depending on the class, which should be considered when selecting positive and negative pairs. Wang et al. (2023) addressed this issue in rotation transformation, but this principle can also apply to several geometric and shifting transformations.

Additionally, several methods use knowledge from pre-trained models to identify normal data patterns. These methods, including DN2Bergman et al. (2020), PANDAREISS et al. (2021), and MSADREISS & HOSHEN (2023), first employ the pre-trained models to extract features that represent typical data points. Then, they utilize techniques like k-nearest neighbors (KNN) and Gaussian mixture models (GMM) to assess the distance of new data points from the established set of normal features. This distance is used to calculate an anomaly score.

Furthermore, outlier exposure (OE) is a new technique proposed for anomaly detection tasks, which uses an auxiliary dataset of outliers Hendrycks et al. (2018). The main problem with OE is its reliance on a large and diverse outlier dataset during training, which may not be readily available in many practical scenarios. Additionally, the learned representations may not generalize well to unseen outlier distributions, and in the case of irrelevant outliers, performance decreases.

Recently, large pre-trained vision-language models, trained using millions of image-text pairs Radford et al. (2021), have demonstrated strong zero-shot recognition ability in various vision tasks, including anomaly detection. These models rely on the ability to transfer knowledge from auxiliary data to identify unseen anomalies. Early approaches, such as CLIP-AD Liznerski et al. (2022), ZOC Esmaeilpour et al. (2022), and ACR Li et al. (2024), which require tuning on auxiliary data for each target dataset, have been proposed for anomaly classification. Recent approaches focus on both anomaly segmentation and classification. For effective anomaly segmentation, WinCLIP Jeong et al. (2023) employs a wide range of hand-designed text prompts and multiple forward passes of image patches. To improve the modeling of local visual semantics, VAND Chen et al. (2023) introduces learnable linear projection techniques. However, these methods encounter issues because text prompt embeddings lack sufficient generalization, leading to reduced accuracy in identifying anomalies associated with diverse, unseen object semantics. AnomalyCLIP Zhou et al. (2023) tackles these challenges by adapting to diverse datasets after being trained on a general dataset. It uses only two trainable, object-independent text prompts for identifying anomalies and segments images with a single forward pass.

However, these methods rely on learning text prompts to capture anomalies, which may not generalize as well as directly learning from image data. Additionally, they use a combination of global and local loss functions, which could be less efficient compared to our adaptive contrastive learning on image features.

## C REPRODUCIBILITY AND IMPLEMENTATION DETAILS

### C.1 DATASET DETAILS

We conducted experiments using the CIFAR-10, CIFAR-100, and SVHN data sets for anomaly detection. The CIFAR-10 dataset comprises 60,000 color images of 32x32 size, evenly distributed across 10 classes, with each class containing 6,000 images. The CIFAR-100 dataset extends to 100 classes, each with 600 images. Both CIFAR datasets are split into training sets of 50,000 images and testing sets of 10,000 images. The SVHN dataset, derived from Google Street View, consists of more than 600,000 32x32 color images of house numbers, used for digit recognition and classification.

### C.2 PREPROCESSING PROCEDURE

To create the real-world dataset, we used Knowledge Exposure (KE) to generate a list of distances for each original class from various augmentations. These distances were sorted to identify negative augmentations as anomalies. Additionally, in SSA, alongside KE, we employed human supervision to refine the dataset and applied other augmentations and transformations not considered negative in the training process. For example, using KE, Gaussian noise and glass blur were identified as the most negative augmentations for cars. However, in the real world, rotation is considered an anomaly for cars. Therefore, in creating the real-world dataset, we used human supervision to label rotated cars as anomalies.

To create a comprehensive list of anomalies for each class in each dataset, we initially implemented the aforementioned protocols using KE, supplemented by human supervision for accurate and real-world scenario selection. We then loaded the original dataset and iterated through it, applying a randomly selected transformation from our predefined list to each data point. We evaluated whether this transformation was classified as an anomaly based on the previously assembled anomaly transformation list.

For preprocessing, we start with augmenting the original dataset and then feed them into the CLIP image encoder to produce the representations. Then use extracted representations in Wasserstein algorithm for scoring each augmentation.

### C.3 TRAINING PROCEDURE

For training, we utilized ResNet-18 without a classification head as the architecture for our neural network. We trained our model for 50 epochs using the SGD optimizer with a learning rate of 0.01, momentum of 0.9, and a weight decay of  $5e-4$  for each experiment. We used AUROC as the anomaly detection metric, where the AUROC value ranges from 0 to 1, with values closer to 1 indicating better classifier performance. For loss function we utilize the InfoNCE loss Chen et al. (2020) with 0.2 temperature value for better convergence rate. Our findings indicate that using 2 for  $\mathbf{K}$  hyperparameter enhances the generalization which can be interpreted as model being exposed to two distinct augmentations or transformations as positive and negative data which results in constriction of model into more significant features, thereby reducing the likelihood of overfitting to irrelevant features which available in Table 4. Experiments were conducted on NVIDIA RTX 3090 GPUs, and runtimes are approximately 12 hours for training on CIFAR-10.

### C.4 EVALUATION PROCEDURE

In each method discussed previously, we employed standard data and specific configurations unique to each method during their respective training phases. For instance, in the case of CSI, we preserved its fundamental augmentation. We implemented two protocols for every dataset: the standard (SD) and the generalization test (SPD). During the training phase, all models requiring training data were provided with a chosen dataset, undergoing its standard pre-processing without modifications or augmentations to the training procedure. In the testing phase, apart from augmenting the test set, no modifications were made to the test configurations of the methods. For generating augmented datasets we used the Khazaie et al. (2023) framework to be as generalized as possible in training datasets we use hyper-parameter severity equal to 1 but in the proposed dataset we use 5 for severity to become a near real world worst case scenario. For evaluation, we utilized our trained model to

918 extract features from training data for training a one-class SVM with sigmoid kernel. Then for any  
919 input data, we use the same model to extract the features and then predict the label, whether input is  
920 normal or anomalous.  
921

#### 922 C.5 CODE AVAILABILITY 923

924 The code for the implementation of the model and the reproduction of the results of our experiments  
925 can be found at <https://anonymous.4open.science/r/AKKKS-FBB4/>.  
926  
927  
928  
929  
930  
931  
932  
933  
934  
935  
936  
937  
938  
939  
940  
941  
942  
943  
944  
945  
946  
947  
948  
949  
950  
951  
952  
953  
954  
955  
956  
957  
958  
959  
960  
961  
962  
963  
964  
965  
966  
967  
968  
969  
970  
971
